# Supplementary material for: Emotional Eating in Relation to Worries and Psychological Distress Amid the COVID-19 Pandemic: A Population-Based Survey on Adults in Norway
Source: MDPI journal article supplement (doi:10.3390/ijerph18010130), 2020-12-27
Supplement: s1 [file s1]

**Table S1**– Multinomial logistic regression of emotional eating by predictors.

|                                | Relative risk ratios |       |       |       |       |        |
|--------------------------------|----------------------|-------|-------|-------|-------|--------|
|                                | 2                    | 3     | 4     | 5     | 6     | 7      |
| <b>Gender</b>                  |                      |       |       |       |       |        |
| Male                           | Ref.                 | Ref.  | Ref.  | Ref.  | Ref.  | Ref.   |
| Female                         | 1,7**                | 2,1** | 2,3** | 2,1** | 2,9** | 2,6**  |
| <b>Age</b>                     |                      |       |       |       |       |        |
| 18-29                          | Ref.                 | Ref.  | Ref.  | Ref.  | Ref.  | Ref.   |
| 30-39                          | 1,1                  | 1,0   | 1,2*  | 1,3** | 1,4*  | 2,0**  |
| 40-49                          | 1,0                  | 1,0   | 1,1   | 1,0   | 1,1   | 1,7**  |
| 50-59                          | 1,0                  | 0,9*  | 0,9   | 0,7** | 0,8   | 1,4*   |
| 60-69                          | 0,9*                 | 0,8*  | 0,7** | 0,5** | 0,4** | 0,8    |
| 70+                            | 0,7**                | 0,5** | 0,5** | 0,3** | 0,2** | 0,4**  |
| <b>Education level</b>         |                      |       |       |       |       |        |
| Primary school                 | Ref.                 | Ref.  | Ref.  | Ref.  | Ref.  | Ref.   |
| High or trade school           | 1,0                  | 1,1   | 1,0   | 1,1   | 1,2   | 1,0    |
| ≤ 3 years of higher education  | 1,1                  | 1,1   | 1,1   | 1,2   | 1,3   | 0,8    |
| ≥ years of higher education    | 1,2*                 | 1,1   | 1,0   | 1,2   | 1,3   | 0,7*   |
| <b>Quarantined</b>             |                      |       |       |       |       |        |
| No                             | Ref.                 | Ref.  | Ref.  | Ref.  | Ref.  | Ref.   |
| Yes                            | 1,1*                 | 1,3** | 1,2*  | 1,3** | 1,2*  | 1,4*   |
| <b>Temporarily laid-off</b>    |                      |       |       |       |       |        |
| No                             | Ref.                 | Ref.  | Ref.  | Ref.  | Ref.  | Ref.   |
| Yes                            | 1,2*                 | 1,0   | 0,9   | 1,1   | 1,0   | 0,9    |
| <b>Health-related worrie</b>   |                      |       |       |       |       |        |
| None                           | Ref.                 | Ref.  | Ref.  | Ref.  | Ref.  | Ref.   |
| Some                           | 1,2*                 | 1,5** | 1,4** | 1,4** | 1,3*  | 1,2*   |
| Substantial                    | 1,1                  | 1,5** | 1,4** | 1,5** | 1,4*  | 1,6**  |
| <b>Economy-related worries</b> |                      |       |       |       |       |        |
| None                           | Ref.                 | Ref.  | Ref.  | Ref.  | Ref.  | Ref.   |
| Some                           | 1,1                  | 1,4** | 1,5** | 1,3** | 1,6** | 1,5**  |
| Substantial                    | 1,0                  | 1,4** | 1,8** | 1,7** | 2,3** | 3,0**  |
| <b>Psychological distress</b>  |                      |       |       |       |       |        |
| SCL10 ≤ 1,85                   | Ref.                 | Ref.  | Ref.  | Ref.  | Ref.  | Ref.   |
| SCL10 ≥ 1,85                   | 1,9**                | 3,5** | 4,7** | 6,7** | 9,9** | 12,5** |

\*significant at p < 0.05

\*\*significant at p < 0.001
